# Supplementary material for: A reversible Renilla luciferase protein complementation assay for rapid identification of protein–protein interactions reveals the existence of an interaction network involved in xyloglucan biosynthesis in the plant Golgi apparatus
Source: PubMed Central journal article supplement (PMC4265154; doi:10.1093/jxb/eru401), 2014-10-18
Supplement: supp_eru401_jexbot129619_file001.pdf [file supp_eru401_jexbot129619_file001.pdf]

## Supplementary material

### Title:

A reversible *Renilla* luciferase protein complementation assay for rapid identification of protein-protein interactions revealed the existence of an interaction network involved in xyloglucan biosynthesis in the Golgi apparatus in plant.

### Authors:

Christian Have Lund, Jennifer R. Bromley, Anne Stenbæk, Randi E. Rasmussen, Henrik V. Scheller & Yumiko Sakuragi.

**Figure S1.** Maps of destination vectors produced in this study

**Figure S2.** Refinement of *Rluc*-PCA parameters

**Figure S3.** Prediction of IRX9 protein topology

**Figure S4.** Immunoblot of competition assay

**Figure S5.** Immunoblot of XyG proteins

**Figure S6.** Application of *Rluc*-PCA to test xylan biosynthetic enzymes related PPIs

**Figure S7.** Random interaction of MUR3-bait in split-ubiquitin assay

**Table S1.** Primers sequences used in this study

**Table S2.** OD dependency assay

**A**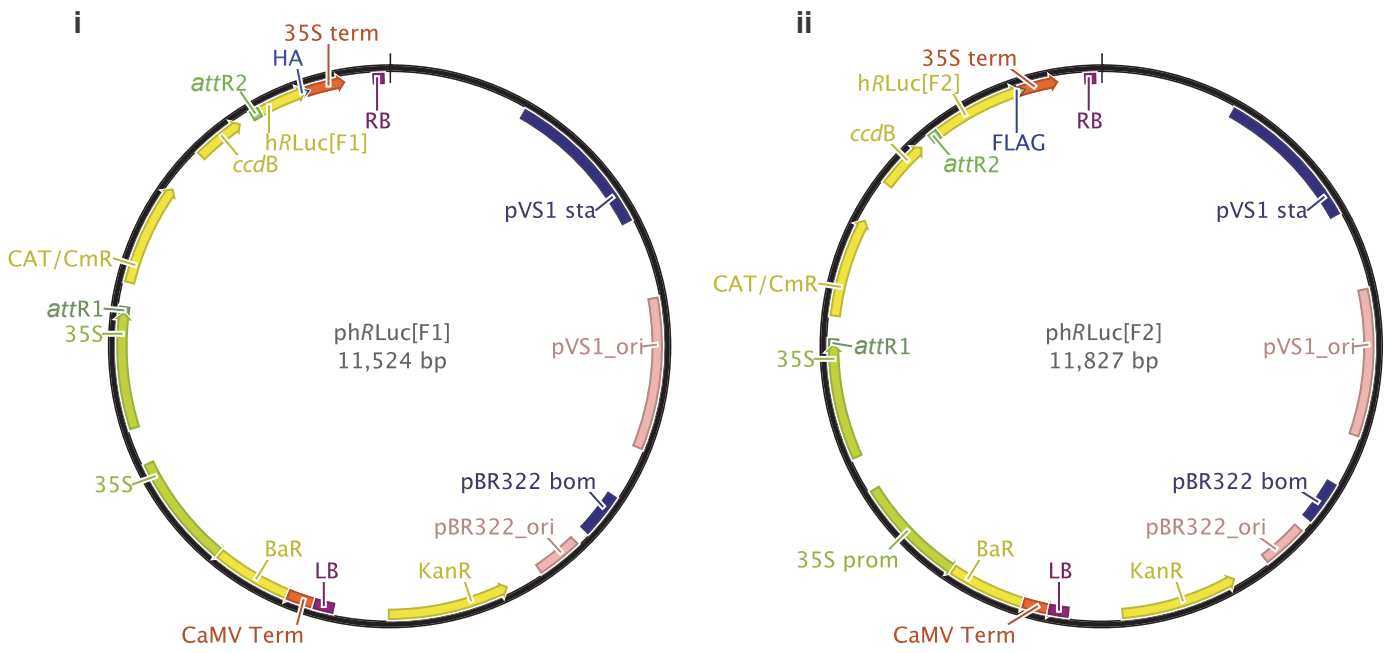**B**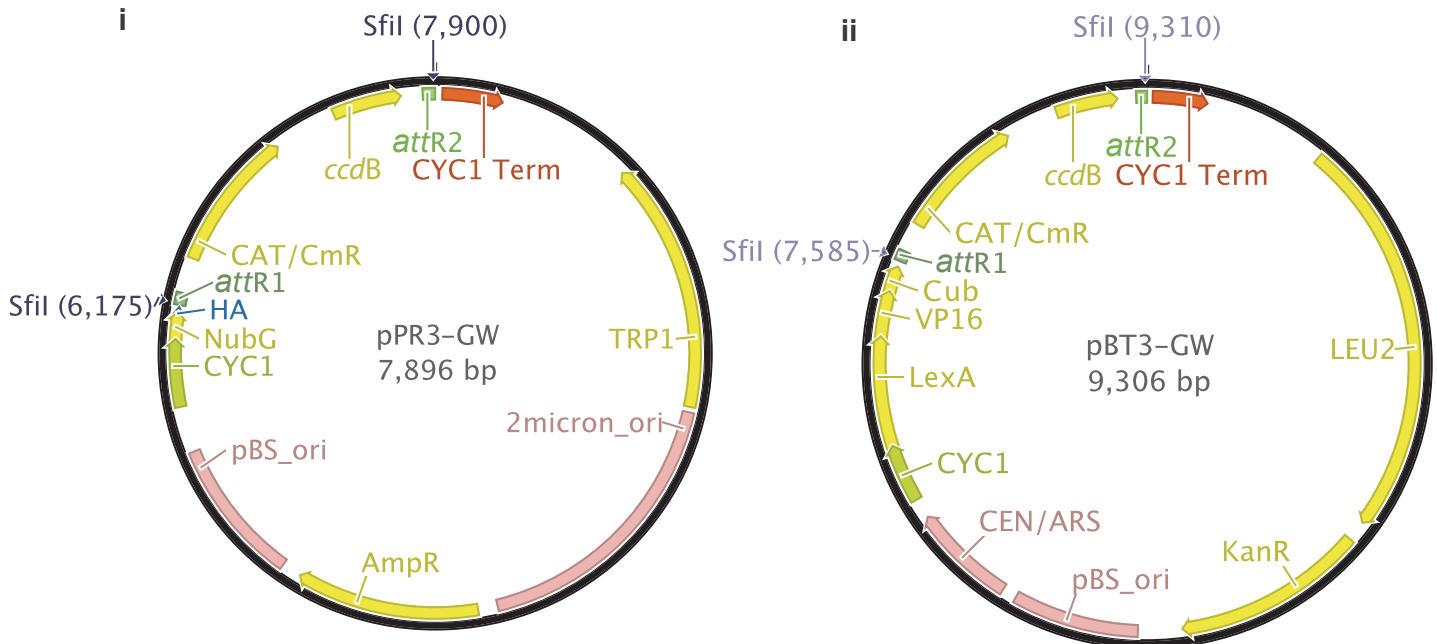

**Fig. S1.** Maps of destination vectors produced in this study **A.** *Rluc*-PCA vectors i. *phRluc*[F1] and ii. *phRluc*[F2] **B.** Split-ubiquitin assay vectors i. *pBT3-GW* ii. *pPR3-GW*.

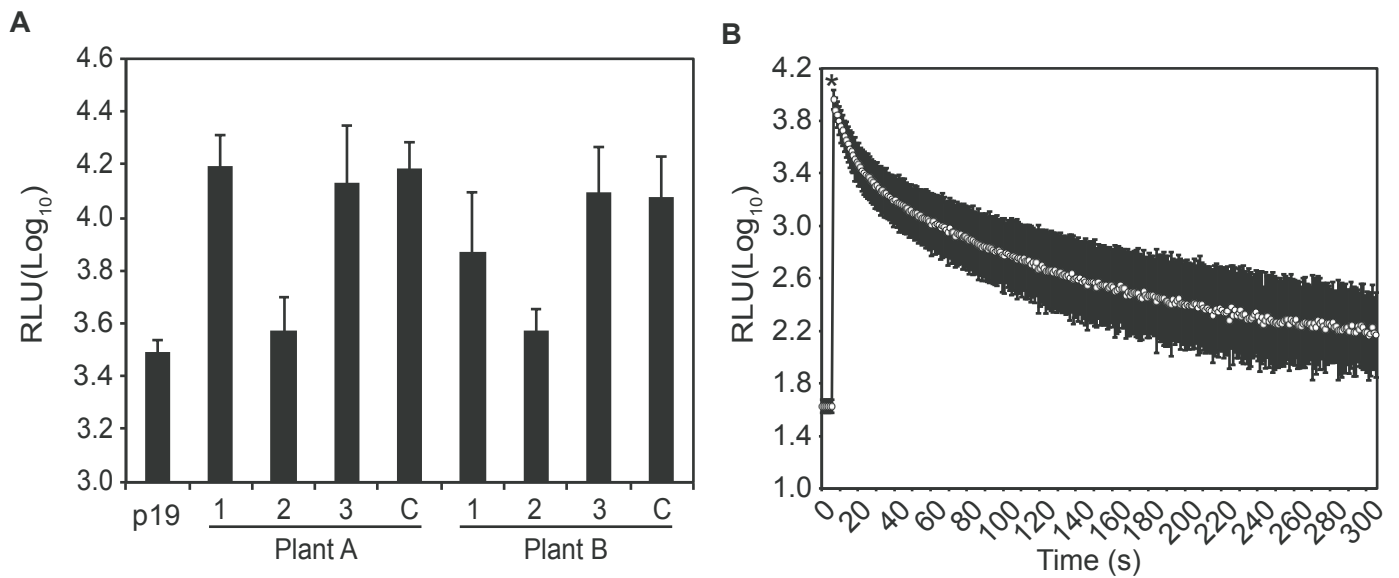

**Fig. S2.** Refinement of *Rluc*-PCA parameters. Complemented h*Rluc* activities measured for *N. benthaminana* transiently transfected with a positive control PPI pair (h*Rluc*-GAUT1-[F1]/h*Rluc*-GAUT7-[F2]). **A.** Assayed from extracts of individual and pooled leaves from the same plant. Numbers represent samples taken from individual leaves, C represents a pooled sample with disks from each leaf. Bioluminescence, RLU(Log<sub>10</sub>), was measured for 30 s for each sample. Error bars represent 95% confidence interval, n=3. **B.** Time course of detected bioluminescence, RLU(Log<sub>10</sub>), after addition of coelenterazine-h to 10 μM (addition marked with \*). Each data point represents bioluminescence detected during a period of 0.5 s. Error bars represent 95% confidence interval, n=3.

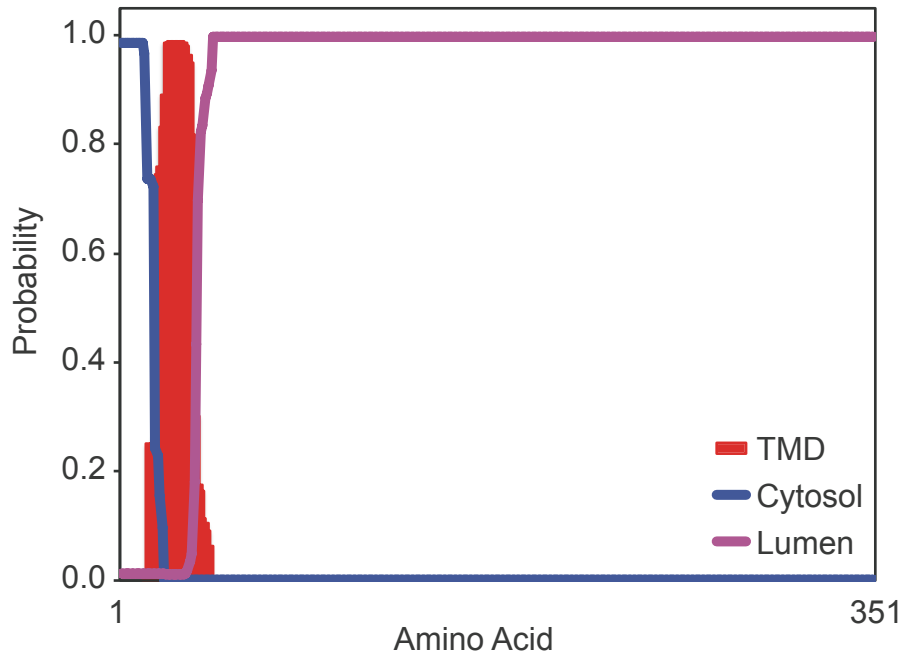

**Fig. S3.** Prediction of IRX9 protein topology. Topology prediction of IRX9 (At2g37090.1) from TmHMM2.0 (<http://www.cbs.dtu.dk/services/TMHMM-2.0/>) (Krogh *et al.*, 2001). This is consistent with those predicted by servers consolidated on ARAMEMNON (<http://aramemnon.botanik.uni-koeln.de/index.ep>) (Schwacke *et al.*, 2003).

| Construct      | OD                                                                                 |     |     |
|----------------|------------------------------------------------------------------------------------|-----|-----|
| 35S-ARAD1-cMyc | 0                                                                                  | 0.2 | 0.4 |
| a-cMyc         |  |     |     |

**Fig. S4.** Immunoblot of competition assay. ARAD1-cMyc was co-expressed as the competitor at increasing Agrobacterial ODs with ARAD1-F1 and ARAD1-F2. p19 was co-expressed in all samples (OD 600nm = 0.05). Immunoblot detection of ARAD1-cMyc was performed with monoclonal anti-cMyc antibody. Approximate size of ARAD1-cMyc is approximately 53 kDa. Bioluminescence signals for the corresponding samples are presented in Table 1.

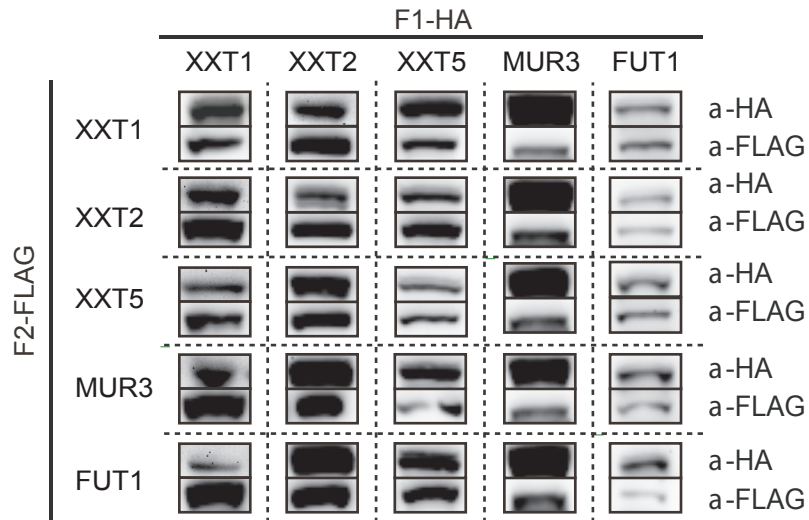

**Fig. S5.** Immunoblot of XyG proteins. Detection of protein expression in macerated tobacco leaf discs using polyclonal HA and monoclonal FLAG antibodies. Approximate sizes of [F1]-HA tagged proteins: *phRluc-XXT1*-[F1], 68 kDa; *phRluc-XXT2*-[F1], 68 kDa; *phRluc-XXT5*-[F1], 67 kDa; *phRluc-MUR3*-[F1], 86 kDa; *phRluc-FUT1*-[F1], 78 kDa; and [F2]-FLAG tagged proteins *phRluc-XXT1*-[F2], 79 kDa; *phRluc-XXT2*-[F2]: 79 kDa; *phRluc-XXT5*-[F2], 77 kDa; *phRluc-MUR3*-[F2], 97 kDa; *phRluc-FUT1*-[F2], 89 kDa.

|         |         | F1-HA         |               |               |               |               |               |               |               |
|---------|---------|---------------|---------------|---------------|---------------|---------------|---------------|---------------|---------------|
|         |         | IRX9          | IRX9-L        | IRX10         | IRX10-L       | IRX14         | IRX14-L       | ARAD1         | p19           |
| F2-FLAG | IRX9    | 3.50<br>±0.29 | 3.61<br>±0.23 | 3.79<br>±0.43 | 3.60<br>±0.12 | 3.68<br>±0.18 | 3.49<br>±0.4  | 3.47<br>±0.33 | 3.50<br>±0.44 |
|         | IRX9-L  | 3.52<br>±0.25 | 3.59<br>±0.14 | 3.70<br>±0.29 | 3.69<br>±0.29 | 3.69<br>±0.14 | 3.67<br>±0.23 | 3.75<br>±0.18 | 3.45<br>±0.33 |
|         | IRX10   | 3.48<br>±0.09 | 3.71<br>±0.08 | 3.68<br>±0.16 | 3.05<br>±0.99 | 3.74<br>±0.20 | 3.73<br>±0.25 | 3.63<br>±0.08 | 3.53<br>±0.20 |
|         | IRX10-L | 3.66<br>0.08  | 3.63<br>±0.07 | 3.69<br>±0.17 | 3.69<br>±0.12 | 3.63<br>±0.22 | 3.47<br>±0.10 | 3.64<br>±0.28 | 3.61<br>±0.20 |
|         | IRX14   | 3.73<br>±0.24 | 3.65<br>±0.14 | 3.67<br>±0.02 | 3.71<br>±0.26 | 3.65<br>±0.28 | 3.70<br>±0.12 | 3.57<br>±0.17 | 3.71<br>±0.06 |
|         | IRX14-L | 3.89<br>±0.27 | 3.52<br>±0.11 | 3.67<br>±0.23 | 3.66<br>±0.09 | 3.61<br>±0.12 | 3.44<br>±0.15 | 3.67<br>±0.19 | 3.33<br>±0.28 |
|         | ARAD1   | 3.59<br>±0.05 | 3.56<br>±0.18 | 3.62<br>±0.10 | 3.67<br>±0.15 | 3.75<br>±0.12 | 3.62<br>±0.08 | 4.72<br>±0.10 | 3.57<br>±0.16 |
|         | p19     | 3.62<br>±0.18 | 3.59<br>±0.30 | 3.58<br>±0.29 | 3.30<br>±0.57 | 3.62<br>±0.29 | 3.64<br>±0.16 | 3.34<br>±0.30 | 3.58<br>±0.28 |

**Fig. S6.** Application of *Rluc*-PCA to test xylan biosynthetic enzymes related PPIs. *Rluc*-PCA showed no PPIs amongst GT43 and GT47 proteins involved in xylan backbone synthesis. ARAD1 was included as a positive control. Heat map of  $\text{Log}_{10}$  values of RLU where dark grey denotes statistically significant higher  $\text{Log}_{10}$  values of RLU above the background level and white the  $\text{Log}_{10}$  values of RLU of the background p19 infiltrated control. A vector containing the silencing suppressor p19 was co-transfected along with GOI-h*Rluc*[F1] and GOI-h*Rluc*[F2]. Error represents 95% confidence interval, n=3.

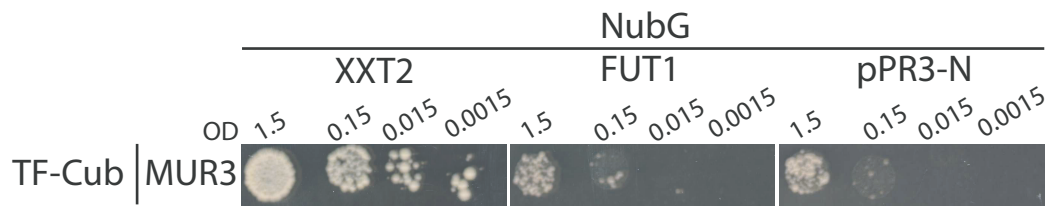

**Fig. S7.** Random interaction of TF-Cub-MUR3 in split-ubiquitin assay. True vs. random interaction illustrated by the true interaction of TF-Cub-MUR3 and NubG-XXT2 due to extensive growth throughout the dilution series and the random interactions between TF-Cub-MUR3 and NubG-FUT1 due to similar growth of random interaction test (TF-Cub-MUR3 against empty pPR3-N vector) with almost exclusively growth in undiluted spot.



**Table S1.** Primers sequences used in this study

| Primer                                                 | Sequence (5'-3')                                                  |
|--------------------------------------------------------|-------------------------------------------------------------------|
| <b>Cloning and relocalising hRluc</b>                  |                                                                   |
| USERF1 F                                               | GGCTTAAUATGGCTTCCAAGGTGTACGA                                      |
| USERF1 R                                               | ATTTTCUTTGGGAAGGTTTCAGCAGCTC                                      |
| USERF2 F                                               | AGAAAAUCATCTTTGTGGGCCACGAC                                        |
| USERF2 R                                               | GGTTTAAUUTACTGCTCGTTCTTCAGCA                                      |
| <i>attB1</i> Luc F                                     | GGGGACAAGTTTGTACAAAAAAGCAGGCTTCACCATGGCTTCCA<br>AGGTGTACGA        |
| <i>attB2</i> Luc R                                     | GGGGACCACTTTGTACAAGAAAGCTGGGTCCTGCTCGTTCTTCA<br>GCACG             |
| <i>attB1</i> ST F                                      | GGGGACAAGTTTGTACAAAAAAGCAGGCTTCACCATGATTCATAC<br>CAACTTGAAGAAAAAG |
| LucST R                                                | AAGCCATGGCCACTTTCTC                                               |
| STLuc F                                                | AGTGGCCATGGCTTCCAA                                                |
| <b>hRluc PCA vector construction</b>                   |                                                                   |
| USERGW F                                               | GGCTTAAUACAAGTTTGTACAAAAAAGCTGAA                                  |
| LucF1GW R                                              | GTACACCTTGGGAAGCACCTACCACTTTGTACAAGAAAGCTGAAC                     |
| GWLucF1 F                                              | CTTGTACAAAGTGGTAGGTGCTTCCAAGGTGTACGACCCCGAG                       |
| USERLucF1HA R                                          | GGTTTAAUTCAAGCGTAATCTGGAACAT                                      |
| LucF2GW R                                              | GATGATTTTCTTTGGACCTACCACTTTGTACAAGAAAGCTGAAC                      |
| GWLucF2 F                                              | CTTGTACAAAGTGGTAGGTCCAAAGAAAATCATCTTTGTGGGC                       |
| USERLucF2FL R                                          | GGTTTAAUTCATTTGTGTCGTCATCGTCTTTGTAGTCGGACCCACCA<br>CCTCCAGAGC     |
| <b>Gateway enabling DUALmembrane vectors</b>           |                                                                   |
| SfiGW F                                                | GGCCATTACGGCCACAAGTTTGTACAAAAAAGCTGAAC                            |
| SfiGWSTOP R                                            | GGCCAAGGAGGCTCATACCACTTTGTACAAGAAAGCT                             |
| <b>Production of entry vectors by BP recombination</b> |                                                                   |
| GAUT1 F                                                | GGGGACAAGTTTGTACAAAAAAGACGGCTATGGCGCTAAAGCGA<br>GGGCT             |
| GAUT1 R                                                | GGGACCACTTTGTACAAGAAAGCTGGGTGTTTCATGAAGGTTGCA<br>ACGAC            |
| GAUT7 F                                                | GGGGACAAGTTTGTACAAAAAAGACGGCTATGAAAGGCGGAGGC<br>GGTGG             |
| GAUT7 R                                                | GGGACCACTTTGTACAAGAAAGCTGGGTGAGGATTCACGTTACA<br>GTCAC             |
| ARAD1 F                                                | GGGGACAAGTTTGTACAAAAAAGCAGGCTTCACCATGGCGCGTA<br>AATCTTCC          |
| ARAD1 R                                                | GGGGACCACTTTGTACAAGAAAGCTGGGTCAATGGAAGTGATAA<br>GACCGGTTT         |

---

|        |                                                               |
|--------|---------------------------------------------------------------|
| IRX9 F | GGGGACAAGTTTGTACAAAAAAGACGGTCACCATGGGATCTCTA<br>GAGAGATCAAAG  |
| IRX9 R | GGGACCACTTTGTACAAGAAAGCTGGGTTCGGTGCTTAAACGTGT<br>TCTTGTGGGAAA |
| XXT5 F | GGGGACAAGTTTGTACAAAAAAGACGGTCACCATGGGTCAAGAT<br>GGTTCGCC      |
| XXT5 R | GGGACCACTTTGTACAAGAAAGCTGGGTTCGTTCTGTGGTTTGGT<br>TTCC         |
| MUR3 F | GGGGACAAGTTTGTACAAAAAAGACGGTCACCATGTTTCCAAGG<br>GTTTCTATGAGG  |
| MUR3 R | GGGACCACTTTGTACAAGAAAGCTGGGTTCCTGTGTCTTATCTCTC<br>TGC         |
| FUT1 F | GGGGACAAGTTTGTACAAAAAAGACGGTCACCATGGATCAGAAT<br>TCGTACAG      |
| FUT1 R | GGGACCACTTTGTACAAGAAAGCTGGGTCTACTAGCTTAAGTCC<br>CCAGC         |

---

Cloning into DUALmembrane vectors via Sfil restriction site

---

|         |                                               |
|---------|-----------------------------------------------|
| XXT1 F  | ATTAACAAGGCCATTACGGCCATGATAGAGAAGTGTATAGG     |
| XXT1 R  | AACTGATTGGCCGAGGCGGCCTCACGTCGTCGTCGTAAGC      |
| XXT2 F  | ATTAACAAGGCCATTACGGCCATGATTGAGAGGTGTTTAGG     |
| XXT2 R  | AACTGATTGGCCGAGGCGGCCTCAAATTGATTGGTTTGTACC    |
| XXT5 F  | ATTAACAAGGCCATTACGGCCATGGGTCAAGATGGTTCGCC     |
| XXT5 R  | AACTGATTGGCCGAGGCGGCCTAGTTCTGTGGTTTGGTTTCC    |
| CSLC4 F | ATTAACAAGGCCATTACGGCCATGGCTCAAATTCAGTAGC      |
| CSLC4 R | AACTGATTGGCCGAGGCGGCCTAGCTGATCTGTTCTCCGATC    |
| MUR3 F  | ATTAACAAGGCCATTACGGCCATGTTTCCAAGGGTTTCTATGAGG |
| MUR3 R  | AACTGATTGGCCGAGGCGGCCTCACTGTGTCTTATCTCTCTGC   |

---

**Table S2.** OD dependency assay. F1 and F2-tagged ARAD1 were co-infiltrated in different OD's along with infiltration of p19 in all samples to investigate the dependency of OD in relation to *Rluc*-PCA.

|          | OD of<br>ARAD1-F1 | OD of<br>ARAD1-F2 | Log <sub>10</sub> (RLU) | P value vs. p19 | P value Vs. Pair 1 |
|----------|-------------------|-------------------|-------------------------|-----------------|--------------------|
| Pair 1   | 0.2               | 0.2               | 3.86<br>±0.02           | <0.001          |                    |
| Pair 2   | 0.1               | 0.1               | 3.92<br>0.03            | <0.001          | >0.1               |
| Pair 3   | 0.05              | 0.05              | 3.97<br>±0.05           | <0.01           | >0.1               |
| Pair 4   | 0.025             | 0.025             | 3.78<br>±0.03           | <0.01           | >0.05              |
| Pair 5   | 0.2               | 0.05              | 3.92<br>±0.06           | <0.01           | >0.1               |
| Pair 6   | 0.1               | 0.05              | 3.91<br>±0.05           | <0.01           | >0.1               |
| p19 only | -                 | -                 | 3.61<br>±0.2            |                 |                    |
